# Supplementary material for: Precision Prediction for Dengue Fever in Singapore: A Machine Learning Approach Incorporating Meteorological Data
Source: MDPI journal article supplement (doi:10.3390/tropicalmed9040072), 2024-03-29
Supplement: s1 [file s1]

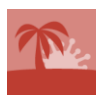

# Supplementary Materials of Precision Prediction for Dengue Fever in Singapore: A Machine Learning Approach Incorporating Meteorological Data

**Table S1.** Number of dengue fever infections and deaths in Singapore from 2012 to 2022.

| Year  | Case   | Death | Fatality Rate (‰) | $\chi^2$ | <i>p</i> -Value |
|-------|--------|-------|-------------------|----------|-----------------|
| 2012  | 4632   | 2     | 0.43              | 32.62    | 0.000           |
| 2013  | 22194  | 7     | 0.32              |          |                 |
| 2014  | 18326  | 5     | 0.27              |          |                 |
| 2015  | 11294  | 2     | 0.18              |          |                 |
| 2016  | 13085  | 11    | 0.84              |          |                 |
| 2017  | 2767   | 0     | 0.00              |          |                 |
| 2018  | 3283   | 5     | 1.52              |          |                 |
| 2019  | 15998  | 21    | 1.31              |          |                 |
| 2020  | 35315  | 31    | 0.88              |          |                 |
| 2021  | 5264   | 5     | 0.95              |          |                 |
| 2022  | 32175  | 19    | 0.59              |          |                 |
| Total | 164333 | 108   | 0.66              |          |                 |

**Table S2.** Quantitative characterization of weekly climatological variables.

| Metrics          | Mean    | Median  | Mode    | Standard Deviation | Variance | Q1      | Q3      |
|------------------|---------|---------|---------|--------------------|----------|---------|---------|
| Sealevelpressure | 1010.03 | 1010.00 | 1010.23 | 1.25               | 1.56     | 1009.24 | 1010.82 |
| Solarradiation   | 172.74  | 167.97  | 187.46  | 42.72              | 1825.36  | 145.57  | 196.26  |
| Winddir          | 140.33  | 156.74  | 25.34   | 70.61              | 4985.64  | 75.11   | 192.36  |
| Cloudcover       | 79.44   | 84.36   | 84.79   | 9.80               | 95.94    | 68.68   | 85.93   |
| Humidity         | 78.36   | 78.30   | 78.14   | 3.98               | 15.82    | 75.64   | 81.04   |
| Precipitation    | 60.45   | 57.14   | 71.43   | 28.21              | 795.72   | 42.86   | 85.71   |
| Feelslikemax     | 37.07   | 37.20   | 36.99   | 1.82               | 3.32     | 36.09   | 38.17   |
| Tempmax          | 31.79   | 31.89   | 31.90   | 1.09               | 1.19     | 31.25   | 32.50   |
| Feelslike        | 31.52   | 31.46   | 31.80   | 2.05               | 4.21     | 30.04   | 33.18   |
| Temperature      | 28.26   | 28.27   | 28.27   | 0.92               | 0.84     | 27.67   | 28.91   |
| Feelslikemin     | 26.56   | 25.96   | 25.99   | 1.96               | 3.84     | 25.11   | 27.80   |
| Tempmin          | 25.72   | 25.64   | 26.59   | 0.88               | 0.78     | 25.09   | 26.31   |
| Dew              | 23.93   | 24.00   | 24.09   | 0.69               | 0.48     | 23.63   | 24.33   |
| Windspeed        | 17.47   | 16.93   | 16.33   | 3.69               | 13.60    | 15.11   | 19.12   |
| Solarenergy      | 14.92   | 14.53   | 13.29   | 3.68               | 13.56    | 12.60   | 16.95   |
| Visibility       | 9.61    | 9.76    | 9.93    | 0.77               | 0.59     | 9.49    | 9.97    |
| Uvindex          | 6.37    | 6.29    | 5.71    | 1.56               | 2.44     | 5.21    | 7.57    |
| Precipcover      | 5.81    | 5.36    | 4.17    | 4.47               | 20.00    | 2.98    | 7.74    |
| Precipprob       | 5.32    | 4.14    | 0.00    | 5.73               | 32.79    | 1.39    | 7.35    |
| Case             | 284.93  | 209.00  | 51.00   | 294.22             | 86566.48 | 81.00   | 372.50  |

Table S3. Spearman correlation coefficient among variables.

| Metrics          | Uvindex | Solarenergy | Solarradiation | Visibility | Cloudcover | Sealevelpressure | Winddir | Windspeed | Precipcover | Precipprob | Precipitation | Humidity | Dew   | Feelslikemax | Feelslikemin | Tempmin | Tempmax | Temp  | Case  |       |
|------------------|---------|-------------|----------------|------------|------------|------------------|---------|-----------|-------------|------------|---------------|----------|-------|--------------|--------------|---------|---------|-------|-------|-------|
|                  | x       | y           | n              | y          | er         | re               | r       | d         | er          | b          | n             | y        | w     | e            | n            | ax      | re      | n     | x     | e     |
| Humidity         | -0.42   | -0.49       | -0.49          | -0.38      | -0.15      | -0.19            | 0.06    | -0.38     | 0.69        | 0.63       | 0.65          | 1.00     | 0.34  | -0.52        | -0.52        | -0.24   | -0.67   | -0.53 | -0.56 | -0.12 |
| Precipitation    | -0.35   | -0.42       | -0.42          | -0.38      | -0.12      | -0.22            | 0.26    | -0.34     | 0.73        | 0.64       | 1.00          | 0.65     | 0.21  | -0.31        | -0.35        | -0.15   | -0.40   | -0.40 | -0.36 | -0.08 |
| Winddir          | -0.35   | -0.33       | -0.33          | -0.14      | 0.08       | -0.35            | 1.00    | -0.47     | 0.21        | 0.25       | 0.26          | 0.06     | 0.17  | 0.20         | 0.13         | 0.06    | 0.15    | 0.07  | -0.06 | 0.02  |
| Precipprob       | -0.29   | -0.41       | -0.41          | -0.34      | -0.32      | -0.27            | 0.25    | -0.43     | 0.87        | 1.00       | 0.64          | 0.63     | 0.30  | -0.23        | -0.24        | -0.07   | -0.34   | -0.27 | -0.32 | -0.12 |
| Dew              | -0.28   | -0.33       | -0.33          | -0.14      | -0.19      | -0.28            | 0.17    | -0.42     | 0.20        | 0.30       | 0.21          | 0.34     | 1.00  | 0.55         | 0.48         | 0.67    | 0.39    | 0.45  | 0.27  | -0.07 |
| Precipcover      | -0.28   | -0.39       | -0.39          | -0.33      | -0.30      | -0.25            | 0.21    | -0.33     | 1.00        | 0.87       | 0.73          | 0.69     | 0.20  | -0.36        | -0.35        | -0.22   | -0.47   | -0.38 | -0.47 | -0.09 |
| Cloudcover       | -0.11   | 0.00        | 0.00           | 0.04       | 1.00       | -0.01            | 0.08    | 0.11      | -0.30       | -0.32      | -0.12         | -0.15    | -0.19 | -0.07        | -0.11        | -0.13   | -0.02   | -0.12 | 0.01  | 0.03  |
| Feelslikemax     | 0.06    | 0.06        | 0.06           | 0.04       | -0.13      | -0.16            | 0.06    | -0.23     | -0.22       | -0.07      | -0.15         | -0.24    | 0.67  | 0.82         | 0.69         | 1.00    | 0.78    | 0.68  | 0.85  | -0.02 |
| Feelslike        | 0.07    | 0.09        | 0.09           | 0.16       | -0.07      | -0.14            | 0.20    | -0.10     | -0.36       | -0.23      | -0.31         | -0.52    | 0.55  | 1.00         | 0.93         | 0.82    | 0.97    | 0.91  | 0.73  | 0.06  |
| Feelslikemin     | 0.08    | 0.08        | 0.08           | 0.19       | -0.11      | -0.08            | 0.13    | 0.00      | -0.35       | -0.24      | -0.35         | -0.52    | 0.48  | 0.93         | 1.00         | 0.69    | 0.91    | 0.98  | 0.61  | 0.06  |
| Tempmin          | 0.11    | 0.11        | 0.11           | 0.21       | -0.12      | -0.04            | 0.07    | 0.02      | -0.38       | -0.27      | -0.40         | -0.53    | 0.45  | 0.91         | 0.98         | 0.68    | 0.90    | 1.00  | 0.62  | 0.07  |
| Sealevelpressure | 0.12    | 0.15        | 0.15           | -0.05      | -0.01      | 1.00             | -0.35   | 0.40      | -0.25       | -0.27      | -0.22         | -0.19    | -0.28 | -0.14        | -0.08        | -0.16   | -0.08   | -0.04 | -0.03 | 0.02  |
| Temperature      | 0.16    | 0.19        | 0.19           | 0.21       | -0.02      | -0.08            | 0.15    | -0.01     | -0.47       | -0.34      | -0.40         | -0.67    | 0.39  | 0.97         | 0.91         | 0.78    | 1.00    | 0.90  | 0.80  | 0.07  |
| Visibility       | 0.20    | 0.20        | 0.20           | 1.00       | 0.04       | -0.05            | -0.14   | 0.25      | -0.33       | -0.34      | -0.38         | -0.38    | -0.14 | 0.16         | 0.19         | 0.04    | 0.21    | 0.21  | 0.14  | -0.08 |
| Tempmax          | 0.25    | 0.30        | 0.30           | 0.14       | 0.01       | -0.03            | -0.06   | -0.02     | -0.47       | -0.32      | -0.36         | -0.56    | 0.27  | 0.73         | 0.61         | 0.85    | 0.80    | 0.62  | 1.00  | 0.02  |
| Windspeed        | 0.27    | 0.30        | 0.30           | 0.25       | 0.11       | 0.40             | -0.47   | 1.00      | -0.33       | -0.43      | -0.34         | -0.38    | -0.42 | -0.10        | 0.00         | -0.23   | -0.01   | 0.02  | -0.02 | 0.07  |
| Solarradiation   | 0.87    | 1.00        | 1.00           | 0.20       | 0.00       | 0.15             | -0.33   | 0.30      | -0.39       | -0.41      | -0.42         | -0.49    | -0.33 | 0.09         | 0.08         | 0.06    | 0.19    | 0.11  | 0.30  | 0.22  |
| Solarenergy      | 0.87    | 1.00        | 1.00           | 0.20       | 0.00       | 0.15             | -0.33   | 0.30      | -0.39       | -0.41      | -0.42         | -0.49    | -0.33 | 0.09         | 0.08         | 0.06    | 0.19    | 0.11  | 0.30  | 0.22  |
| Uvindex          | 1.00    | 0.87        | 0.87           | 0.20       | -0.11      | 0.12             | -0.35   | 0.27      | -0.28       | -0.29      | -0.35         | -0.42    | -0.28 | 0.07         | 0.08         | 0.06    | 0.16    | 0.11  | 0.25  | 0.21  |
| Case             | 0.21    | 0.22        | 0.22           | -0.08      | 0.03       | 0.02             | 0.02    | 0.07      | -0.09       | -0.12      | -0.08         | -0.12    | -0.07 | 0.06         | 0.06         | -0.02   | 0.07    | 0.07  | 0.02  | 1.00  |

**Table S4.** Evaluation of the predictive efficacy among various models in Mode 1.

| Model   | MAE    | RMSE   | R-squared |
|---------|--------|--------|-----------|
| GLM     | 258.19 | 328.40 | 0.16      |
| SVM     | 159.88 | 267.86 | 0.51      |
| GBM     | 136.08 | 204.67 | 0.65      |
| DT      | 158.85 | 260.59 | 0.44      |
| RF      | 154.97 | 228.24 | 0.64      |
| XGBoost | 89.12  | 156.07 | 0.83      |

MAE = Mean Absolute Error; RMSE = Root mean square error; R-squared =  $R^2$ **Table S5.** Evaluation of the predictive efficacy among various models in Mode 2.

| Model   | MAE    | RMSE   | R-squared |
|---------|--------|--------|-----------|
| GLM     | 255.32 | 325.75 | 0.16      |
| SVM     | 160.73 | 268.83 | 0.50      |
| GBM     | 204.82 | 285.22 | 0.26      |
| DT      | 233.76 | 366.36 | 0.00      |
| RF      | 194.98 | 284.69 | 0.27      |
| XGBoost | 199.21 | 300.34 | 0.18      |

**Table S6.** Evaluation of the predictive efficacy among various models in Mode 3.

| Model   | MAE    | RMSE   | R-squared |
|---------|--------|--------|-----------|
| GLM     | 203.90 | 293.14 | 0.20      |
| SVM     | 170.09 | 288.99 | 0.27      |
| GBM     | 179.66 | 252.08 | 0.40      |
| DT      | 204.73 | 313.16 | 0.18      |
| RF      | 172.87 | 260.45 | 0.42      |
| XGBoost | 160.65 | 232.58 | 0.49      |

**Table S7.** Evaluation of the predictive efficacy among various models in Mode 4.

| Model   | MAE    | RMSE   | R-squared |
|---------|--------|--------|-----------|
| GLM     | 203.12 | 292.13 | 0.21      |
| SVM     | 173.25 | 291.79 | 0.25      |
| GBM     | 200.06 | 269.42 | 0.33      |
| DT      | 196.08 | 304.75 | 0.20      |
| RF      | 180.42 | 266.32 | 0.37      |
| XGBoost | 175.49 | 247.86 | 0.42      |

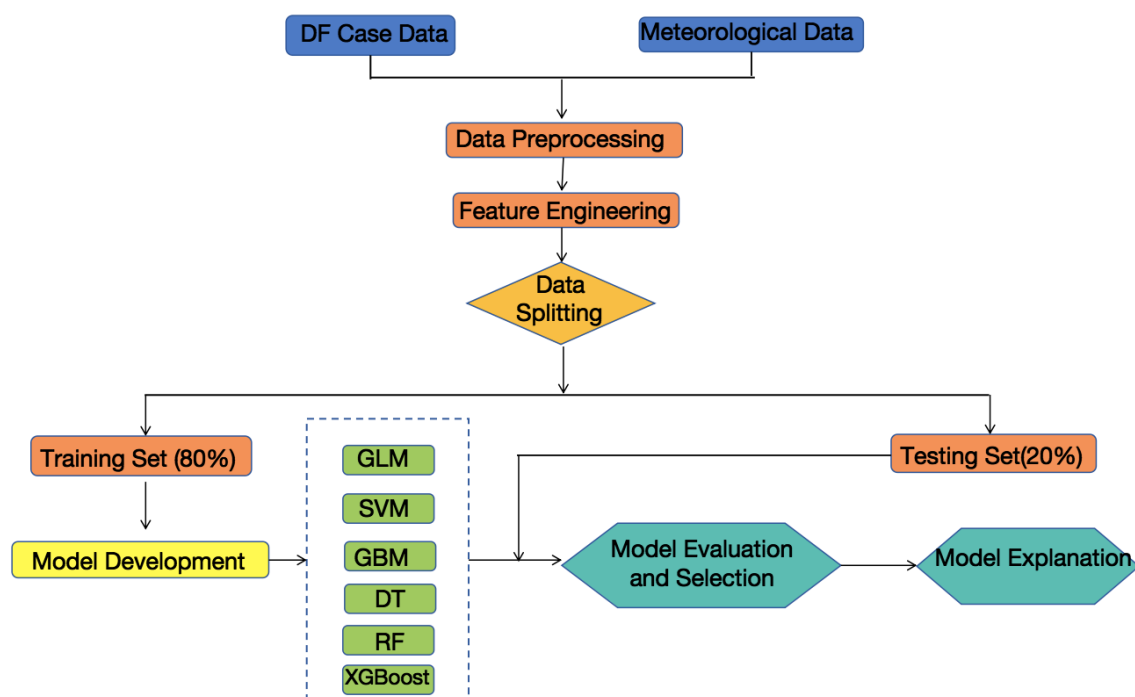

**Figure S1.** The flowchart of the machine learning method.

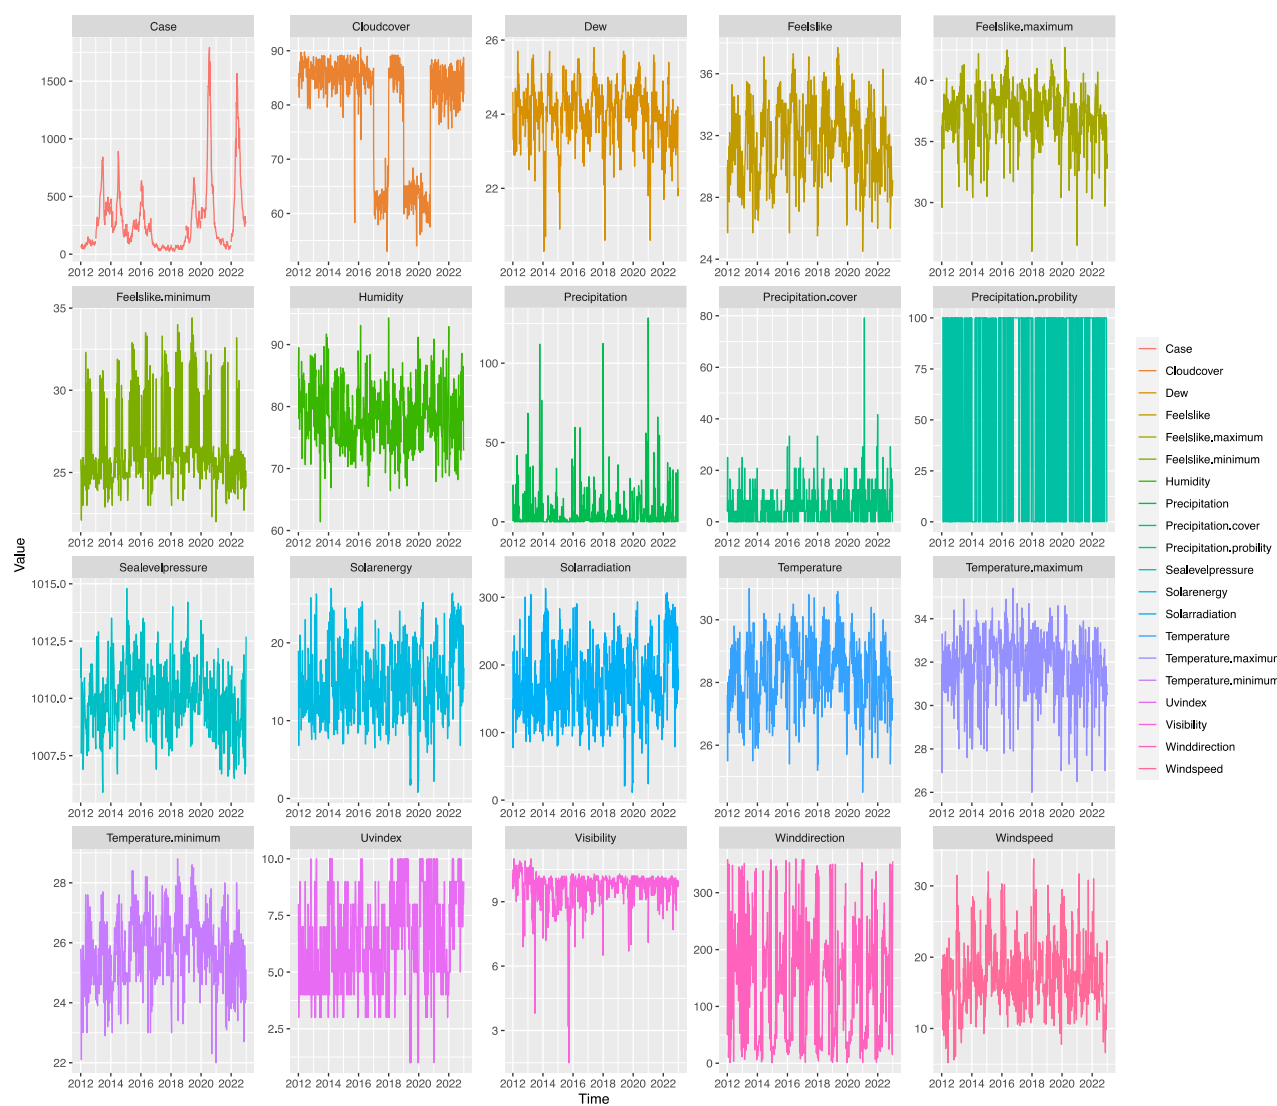

**Figure S2.** Time series plots of weekly climate variables from January 2012 to December 2022.

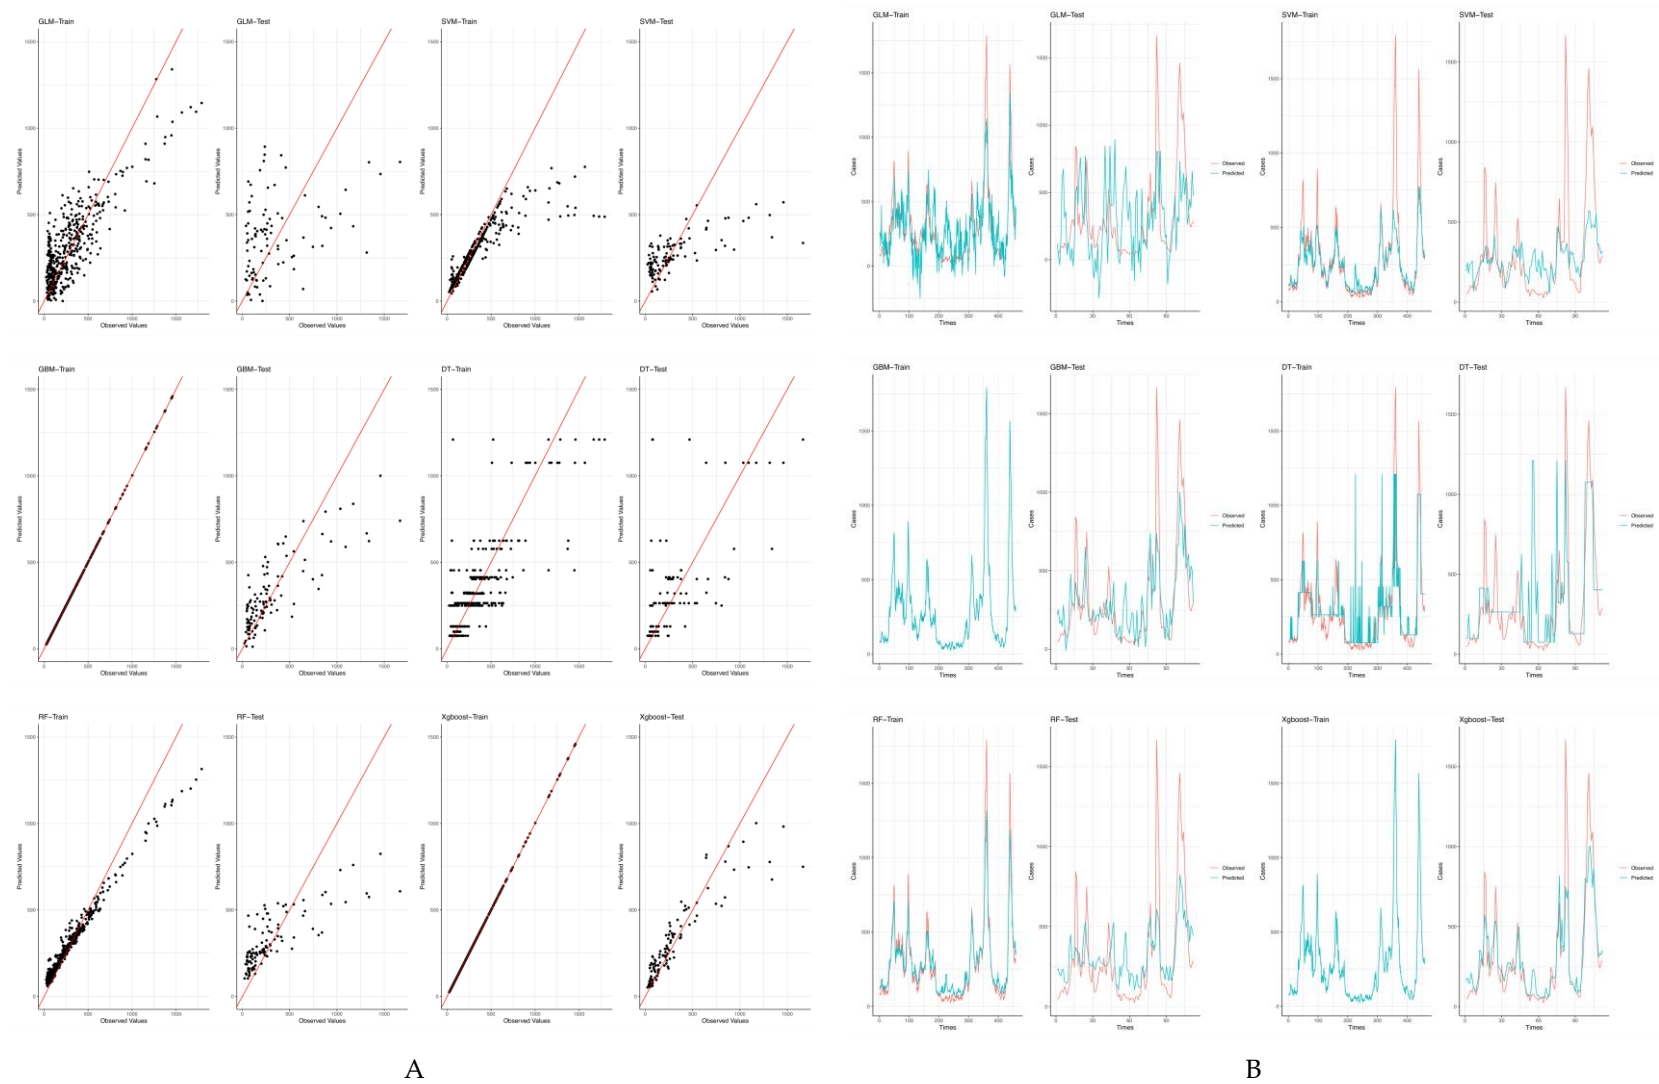

**Figure S3. (A).** Observation and prediction of dengue cases in training data and test data of different models in Mode 1; **(B).** Timeline of observation and prediction of dengue cases in training data and test data of different models in Mode 1 (orange means observation; blue means prediction).

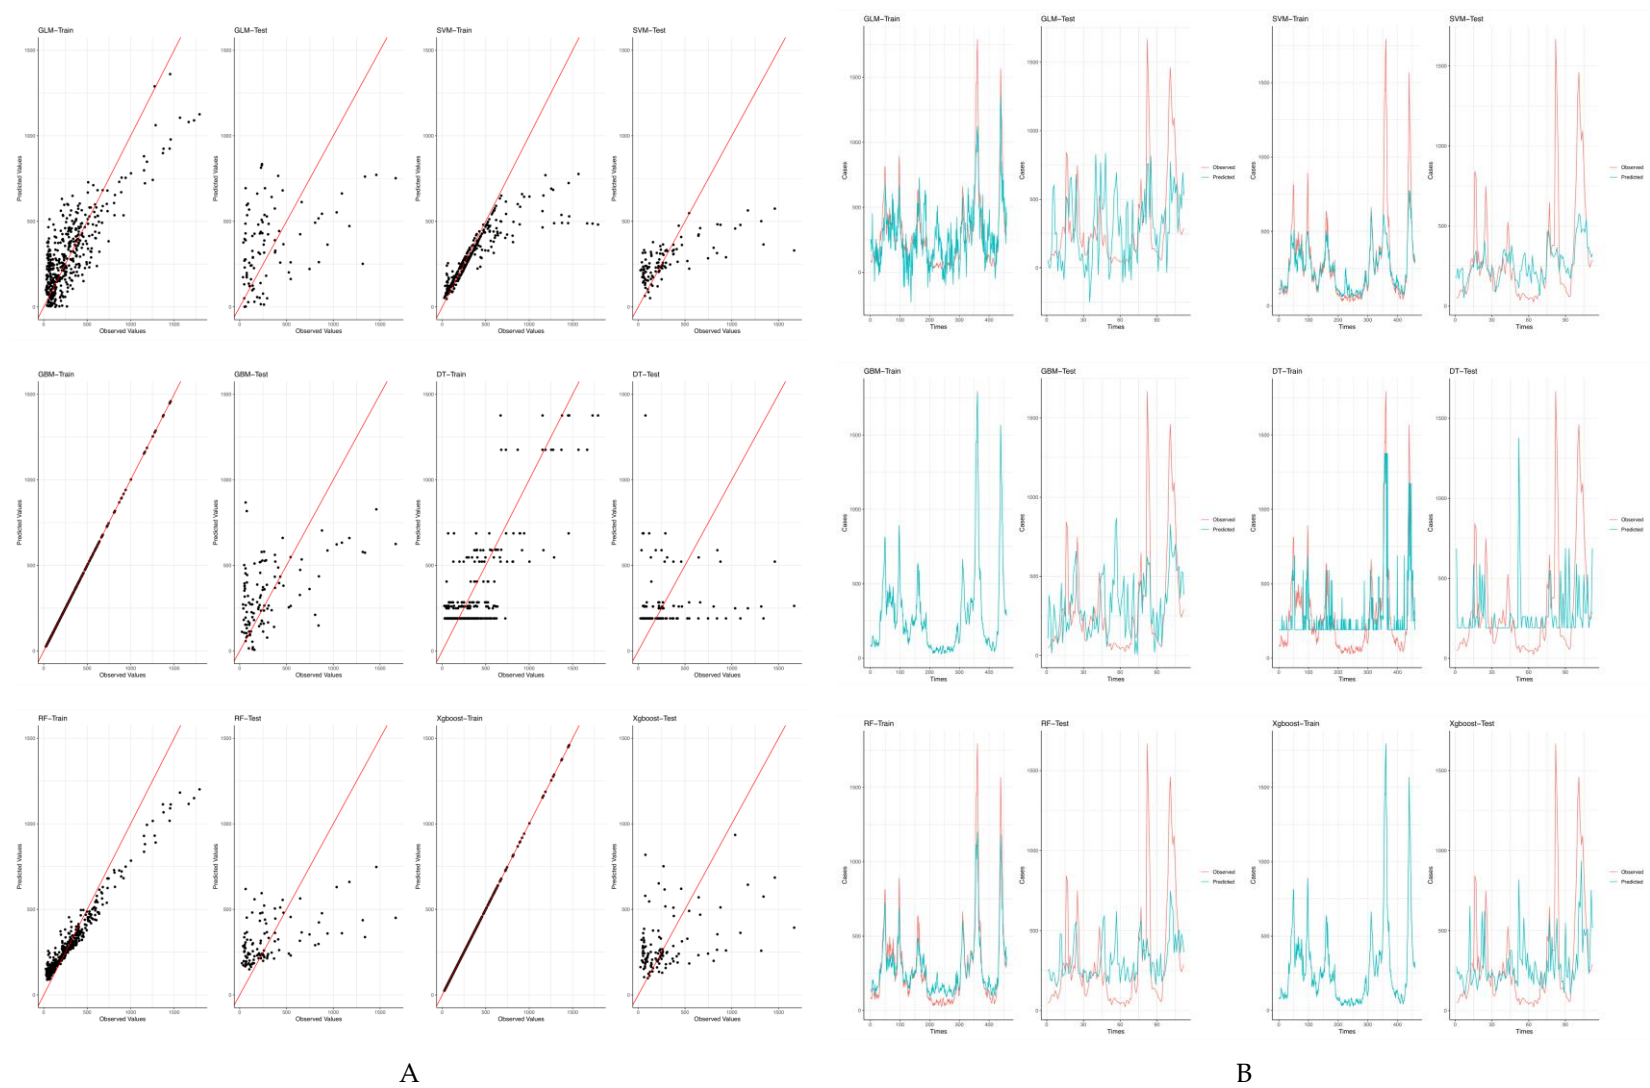

**Figure S4. (A).** Observation and prediction of dengue cases in training data and test data of different models in Mode 2; **(B).** Timeline of observation and prediction of dengue cases in training data and test data of different models in Mode 2 (orange means observation; blue means prediction).

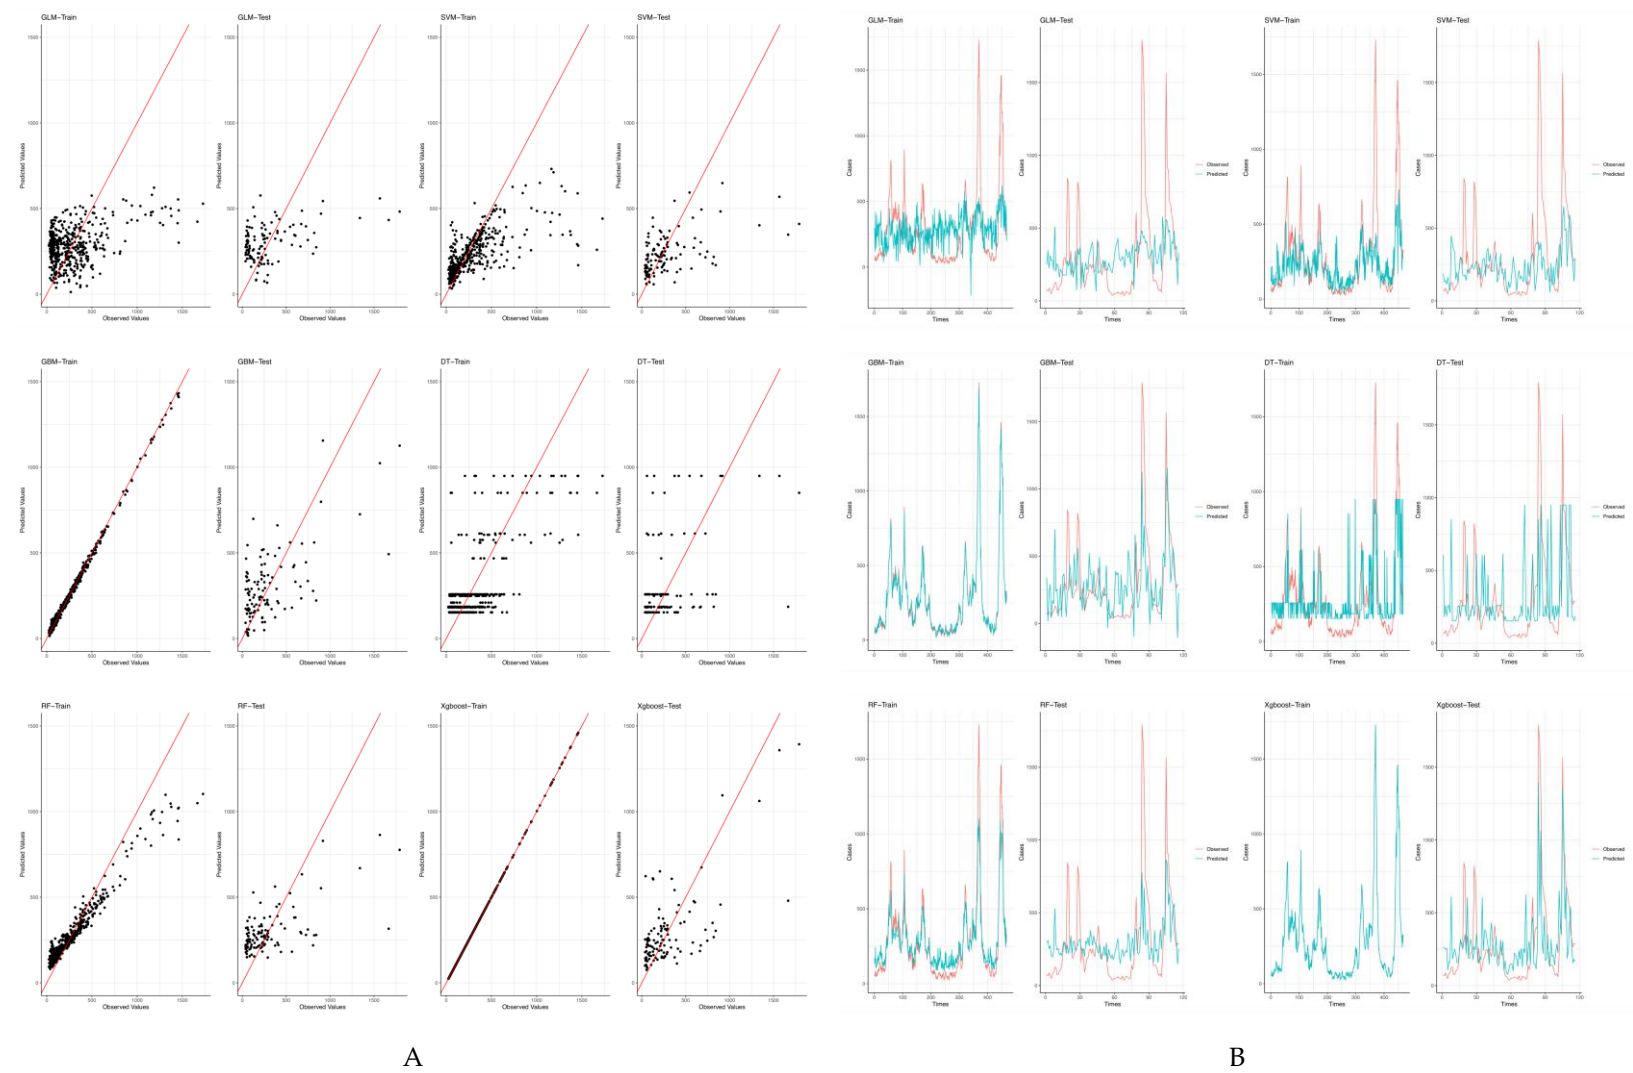

**Figure S5.(A).** Observation and prediction of dengue cases in training data and test data of different models in Mode 3; **(B).** Timeline of observation and prediction of dengue cases in training data and test data of different models in Mode 3 (orange means observation; blue means prediction).



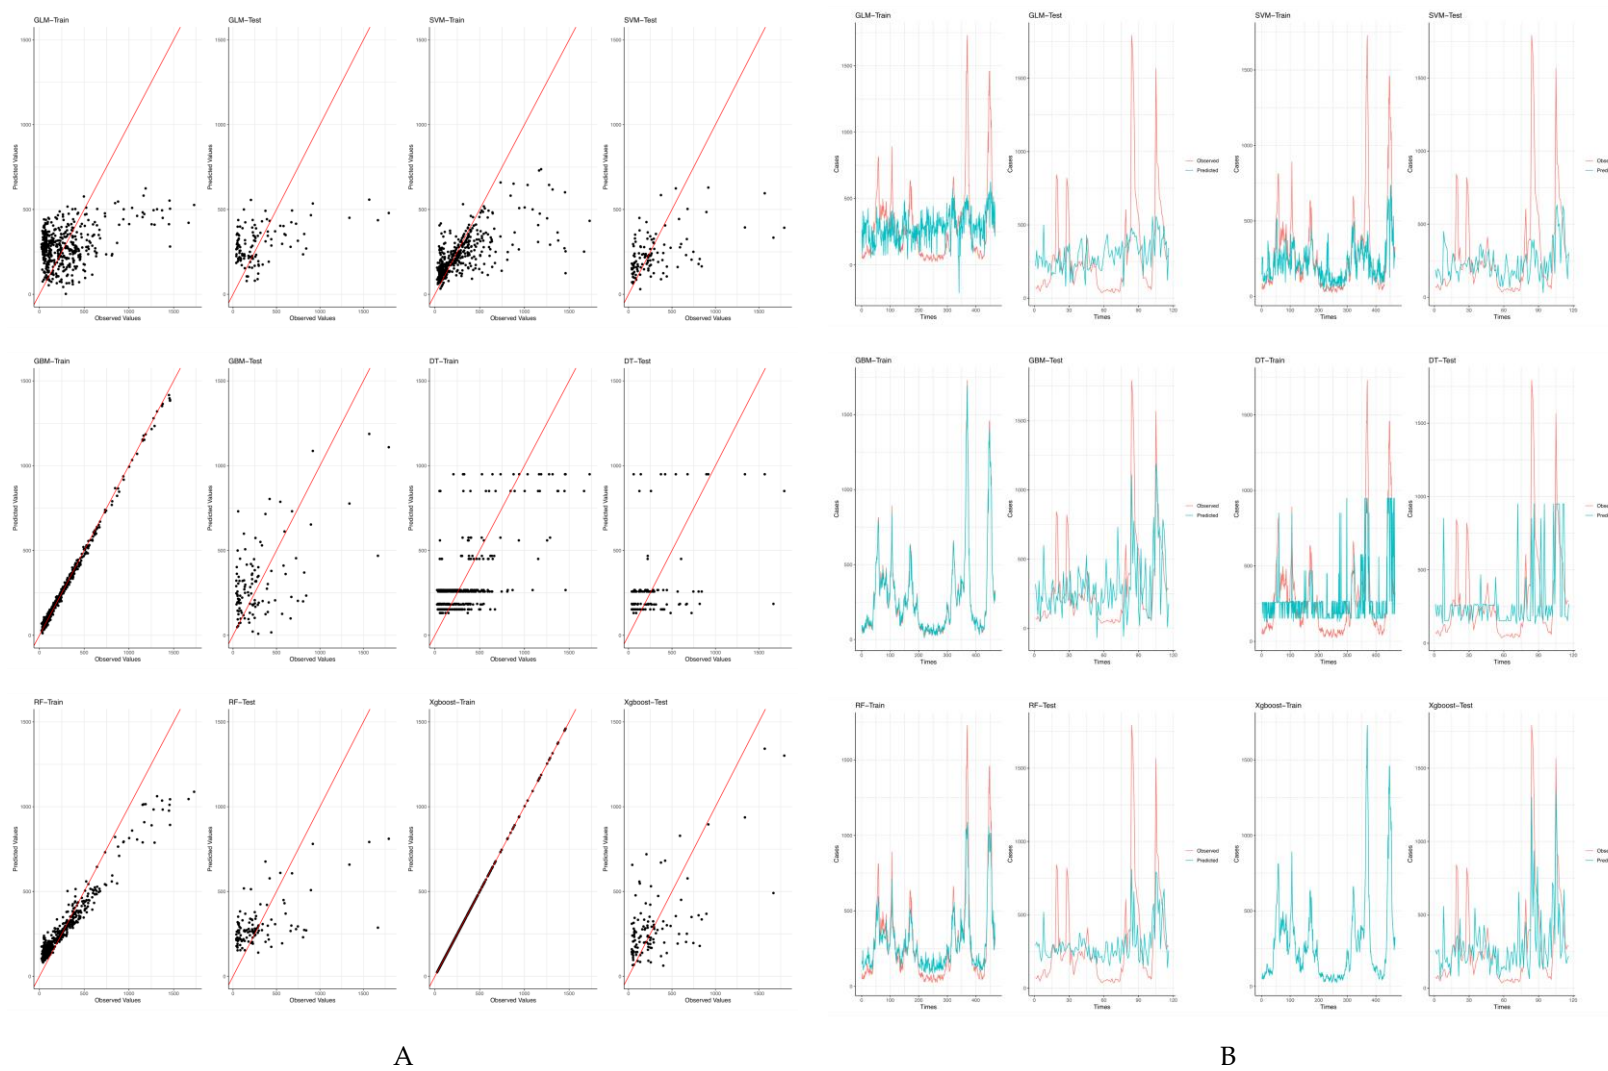

**Figure S6. (A).** Observation and prediction of dengue cases in training data and test data of different models in Mode 4; **(B).** Timeline of observation and prediction of dengue cases in training data and test data of different models in Mode 4 (orange means observation; blue means prediction).

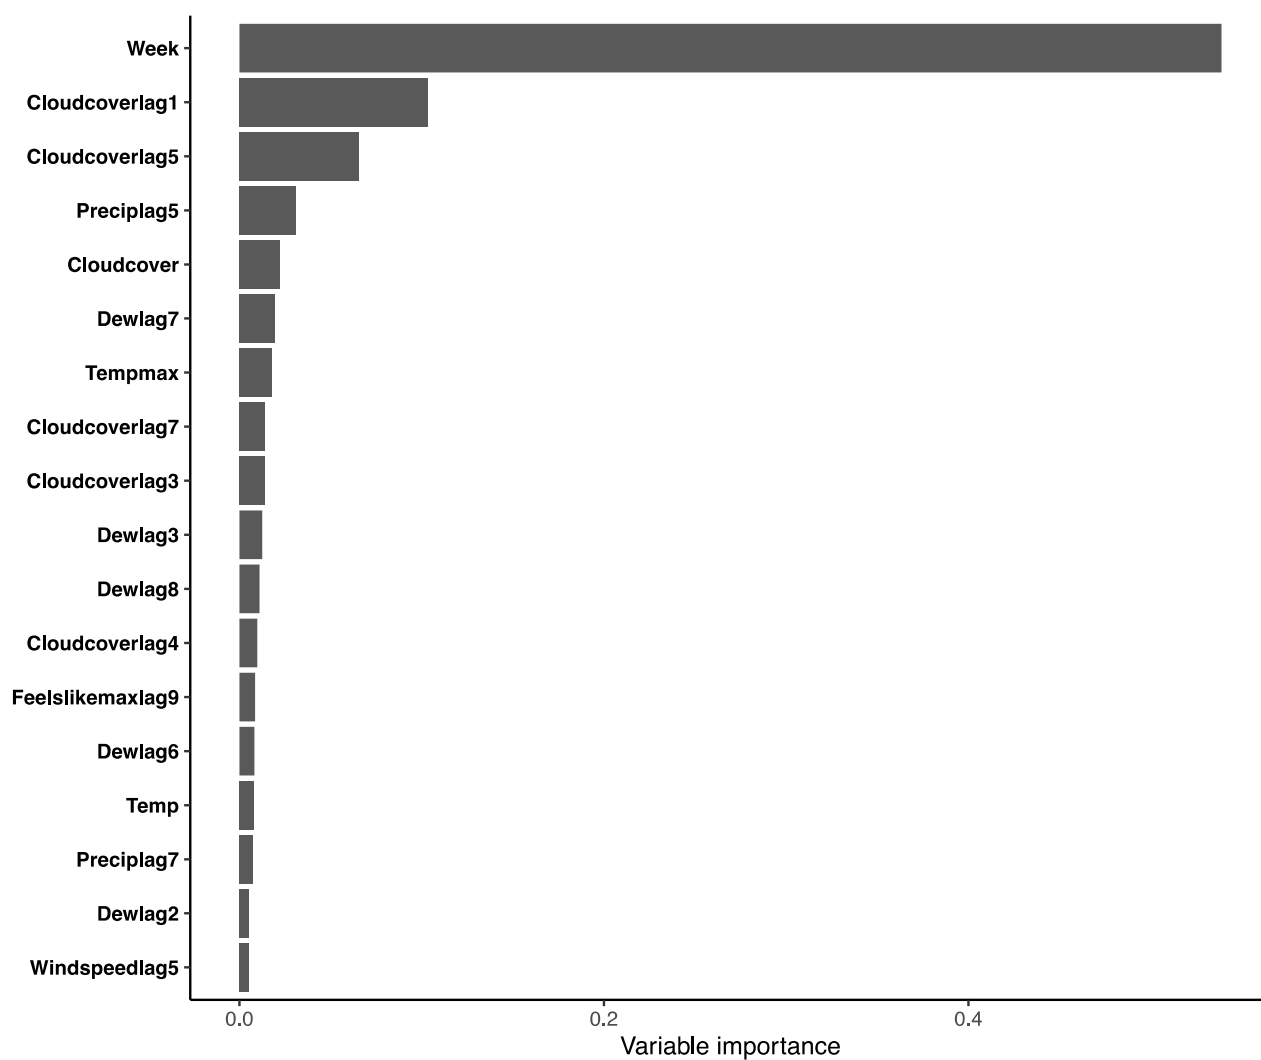

**Figure S7.** The 18 most influential variables from the XGBoost model in Mode 1.
